# Supplementary material for: Predictors and one-year outcomes of patients with delayed graft function after deceased donor kidney transplantation
Source: Springer Nature journal article supplement (doi:10.1186/s12882-020-02181-1), 2020-12-01
Supplement: MOESM3 [file 18657526]

Score of CIT

| CIT (hours) | Score |
|-------------|-------|
| 2           | 0     |
| 4           | 2     |
| 6           | 5     |
| 8           | 7     |
| 10          | 9     |
| 12          | 12    |
| 14          | 14    |
| 16          | 16    |
| 18          | 19    |
| 20          | 21    |
| 22          | 23    |
| 24          | 26    |

Score of WIT

| WIT (minutes) | Score |
|---------------|-------|
| 0             | 0     |
| 2             | 8     |
| 4             | 15    |
| 6             | 23    |
| 8             | 31    |
| 10            | 38    |
| 12            | 46    |
| 14            | 54    |
| 16            | 62    |
| 18            | 69    |
| 20            | 77    |
| 22            | 85    |
| 24            | 92    |
| 26            | 100   |

Score of dialysis duration

| Duration (months) | Score |
|-------------------|-------|
| 0                 | 0     |
| 20                | 3     |
| 40                | 6     |
| 60                | 9     |
| 80                | 12    |
| 100               | 15    |
| 120               | 18    |
| 140               | 20    |
| 160               | 23    |
| 180               | 26    |
| 200               | 29    |

Score of terminal Scr

| Scr (mg/dL) | Score |
|-------------|-------|
| 0.0         | 0     |
| 0.5         | 5     |
| 1.0         | 9     |
| 1.5         | 14    |
| 2.0         | 18    |
| 2.5         | 23    |
| 3.0         | 27    |
| 3.5         | 32    |
| 4.0         | 36    |
| 4.5         | 41    |

Score of primary of cause

| Category    | Score |
|-------------|-------|
| Head trauma | 0     |
| Stroke      | 39    |
| Other       | 39    |

Score of Lifeport perfusion

| Category | Score |
|----------|-------|
| No       | 0     |
| Yes      | 25    |

Points per unit of linear predictor: 13.42841

Linear predictor units per point: 0.07446896

Total Score of DGF

| Total score | Risk of DGF |
|-------------|-------------|
| 50          | 5%          |
| 60          | 10%         |
| 71          | 20%         |
| 78          | 30%         |
| 84          | 40%         |
| 89          | 50%         |
| 95          | 60%         |
| 101         | 70%         |
| 108         | 80%         |
| 119         | 90%         |
| 129         | 95%         |
